# Supplementary material
Source: ML conference proceedings conference paper supplement (https://aclanthology.org/D19-1682)
Supplement: Attachment [file ThreadDetectionEMNLP_camera_ready-2257-appendix.pdf › ThreadDetectionEMNLP_camera_ready-2257-appendix.pdf]

## A Time Ranges for Time Difference Embeddings

We encode the ranges of timestamp difference between the predicted message  $m_i$  and an arbitrary message  $m_j$  in the past, ie.  $\text{TimeDiff}(m_i, m_j) = \text{TimeStamp}(m_i) - \text{TimeStamp}(m_j)$  into 11 buckets, shown in Table 6. Then, each bucket is represented by a 20-dimensional embedding in Reddit experiments

| $\text{TimeDiff}(m_i, m_j)$ | index |
|-----------------------------|-------|
| if $m_j$ is PAD             | 0     |
| 0 min.                      | 1     |
| (0mins, 5mins]              | 2     |
| (5mins, 30mins]             | 3     |
| (30mins, 1hours]            | 4     |
| (1hours, 3hours]            | 5     |
| (3hours, 6hours]            | 6     |
| (6hours, 12hours]           | 7     |
| (12hours, 24hours]          | 8     |
| (24hours, 72hours]          | 9     |
| >72hours                    | 10    |

Table 6: Ranges of timestamp difference

## B Reddit Dataset Statistics and Examples

In Table 7, we show the detailed statistics of the three Reddit datasets, including total numbers of threads and messages, their counterparts for train/validation/test sets and message size per thread. Finally, each Reddit comment has a message id to which it replies in the original dataset. Due to the pre-processing steps in section 3, not all the original comments are kept after the data construction procedure. Therefore, we record the percentage of messages whose “reply-to” messages are still present in the dataset. Note that, following (Jiang et al., 2018), this information is not used in the experiments, because a typical chat channel can not have an explicit indication of the “reply-to” parent for every message.

| Dataset            | Gadgets | Iphones | Politics |
|--------------------|---------|---------|----------|
| train threads      | 230     | 539     | 2950     |
| train messages     | 7.4k    | 11.6k   | 84.8k    |
| valid threads      | 30      | 67      | 368      |
| valid messages     | 918     | 1.6k    | 10.2k    |
| test threads       | 28      | 68      | 370      |
| test messages      | 1k      | 1.4k    | 9.9k     |
| msg. per thread    | 32.6    | 21.7    | 28.4     |
| msg. w/ “reply-to” | 73.9%   | 71.9%   | 76.2%    |

Table 7: Dataset statistics

In Table 8, we show a chunk of the real message sequence in Politics dataset. They are sorted by time stamps. For each message, there are 6 attributes. They are thread id, message id, time stamp (in seconds), message body, username, respectively. For example, the messages in blue (1st, 3rd and 4th) belong to the same thread, whose starting message is the first one in the table.

| thread id | message id | time stamp | message body                                                                                                                                                                                                                                                                                                                                                           | username |
|-----------|------------|------------|------------------------------------------------------------------------------------------------------------------------------------------------------------------------------------------------------------------------------------------------------------------------------------------------------------------------------------------------------------------------|----------|
| ...       | ...        | ...        | ...                                                                                                                                                                                                                                                                                                                                                                    | ...      |
| t3_4lyd8p | t3_4lyd8p  | 1464739232 | Cubii Desk Elliptical:<br>Might As Well<br>Work Out While<br>I Work, Right?                                                                                                                                                                                                                                                                                            | tembbo   |
| t3_4lxskc | t1_d3r5xnp | 1464743587 | I was sold until it said<br>it comes with<br>Windows 10<br>pre-installed.                                                                                                                                                                                                                                                                                              | B4U      |
| t3_4lyd8p | t1_d3r67eo | 1464744032 | I have used both a<br>treadmill desk and<br>a bike desk. Treadmill<br>desk is fine for<br>mail and writing/using<br>Word. Powerpoint<br>and Excel which<br>require fine hand<br>movements, I still prefer<br>a normal desk. Not<br>very good with the<br>bike desk...can<br>basically just browse.<br>On the treadmill<br>desk, my "bottom<br>half" goes on autopilot. | tembbo   |
| t3_4lyd8p | t1_d3r6byp | 1464744238 | Maybe different stokes<br>for different folks? I suck at<br>biking - can relate about<br>not being able to work<br>on a bike desk.                                                                                                                                                                                                                                     | phhhhart |
| t3_4loba7 | t1_d3r6klt | 1464744620 | People seem to make<br>this mistake a lot.,<br>It's also worth noting<br>that if you've been<br>into subcompacts,<br>ultraportables,<br>netbooks, etc,<br>you're probably<br>used to putting up<br>with some dongles<br>or breakouts or other<br>inconveniences due<br>to the form factor.                                                                             | Batman   |
| ...       | ...        | ...        | ...                                                                                                                                                                                                                                                                                                                                                                    | ...      |

Table 8: Data example in Politics dataset
